# Supplementary material
Source: Springer Nature journal article supplement (https://www.springermedizin.de/resource/supplementary/12913_2009_1265_MOESM2_ESM.pdf/9527730)

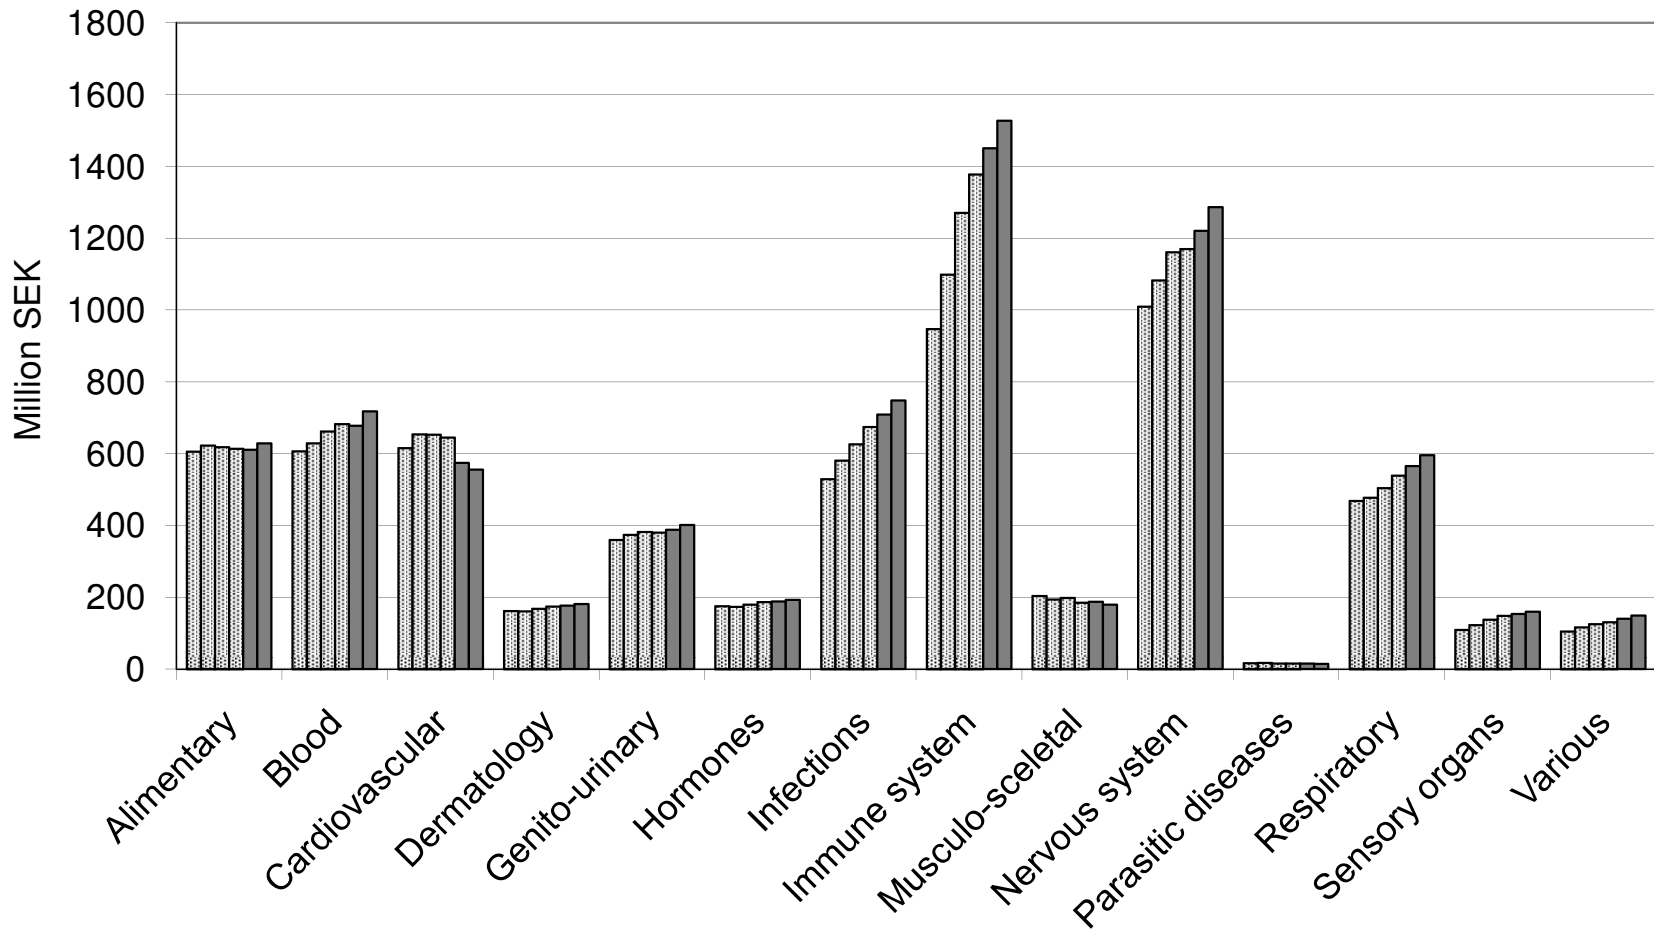

Supplement: MOESM2 [file 9527730]
